# Supplementary material for: Incidence and Risk Factors for New-Onset Diabetes in HIV-Infected Patients
Source: Oxford University Press journal article supplement (doi:10.2337/dc07-2013), 2008-05-28
Supplement: dc07-2013onlineappendix.doc [file dc07-2013onlineappendix.doc]

**APPENDIX**

**D:A:D Steering Committee:** ***Persons with * below (#: chair)*** and S.Collins, E. Loeliger, R. Tressler, I. Weller;

**D:A:D Central Coordination:** N. Friis-Møller, S.W. Worm, C.A. Sabin, A Sjøl (verification of primary endpoint), J.D. Lundgren;

**D:A:D data managers:** A. Sawitz (coordinator), M. Rickenbach, P. Pezzotti, E. Krum, L.Gras, E. Balestre, A. Sundström, B. Poll, E. Fontas, F. Torres, K. Petoumenos, J. Kjær.

The members of the 11 Cohorts are as follows:

**ATHENA (AIDS Therapy Evaluation Project Netherlands):**

***Central coordination:*** F. de Wolf, S. Zaheri, L. Gras;

***participating physicians (city):*** W. Bronsveld, M.E. Hillebrand-Haverkort (*Alkmaar*), J.M. Prins, J.C. Bos, J.K.M. Eeftinck Schattenkerk, S.E. Geerlings, M.H. Godfried, J.M.A. Lange, F.C. van Leth, S.H. Lowe, J.T.M. van der Meer, F.J.B. Nellen, K. Pogány, T. van der Poll, ***P. Reiss******, Th.A. Ruys, Sankatsing, R. Steingrover, G. van Twillert, M. van der Valk, M.G.A. van Vonderen, S.M.E Vrouenraets, M. van Vugt, F.W.M.N. Wit, A. van Eeden, J.H. ten Veen, P.S. van Dam, J.C. Roos, K. Brinkman, P.H.J. Frissen, H.M. Weigel, J.W. Mulder, E.C.M. van Gorp, P.L. Meenhorst, A.T.A. Mairuhu, J. Veenstra, S.A. Danner, M.A. Van Agtmael, F.A.P. Claessen, R.M. Perenboom, A. Rijkeboer, M. van Vonderen (*Amsterdam*); C. Richter, J. van der Berg, R. van Leusen (*Arnhem*); R. Vriesendorp, F.J.F. Jeurissen, R.H. Kauffmann, E.L.W. Koger, HAGA (*Den Haag*); B. Bravenboer (*Eindhoven*); C.H.H. ten Napel, G.J. Kootstra (*Enschede*); H.G. Sprenger, W.M.A.J. Miesen, R. Doedens, E.H. Scholvinck (*Groningen*); R.W. ten Kate (*Haarlem*); D.P.F. van Houte, M. Polee (*Leeuwarden*); F.P. Kroon, van den Broek, J.T. van Dissel, E.F. Schippers (*Leiden*); G. Schreij, S. van de Geest, A. Verbon (*Maastricht*); P.P. Koopmans, M. Keuter, F. Post, A.J.A.M. van der Ven (*Nijmegen*); M.E. van der Ende, I.C. Gyssens, M. van der Feltz, J.G. den Hollander, S. de Marie, J.L Nouwen, B.J.A. Rijnders, T.E.M.S. de Vries (*Rotterdam*); J.R. Juttmann, C. van de Heul, M.E.E. van Kasteren, St. Elisabeth (*Tilburg*); M.M.E. Schneider, M.J.M. Bonten, J.C.C. Borleffs, P.M. Ellerbroek, I.M. Hoepelman, C.A.J.J. Jaspers, I. Schouten, C.A.M. Schurink (*Utrecht*); W.L. Blok, A.A. Tanis (*Vlissingen*); P.H.P. Groeneveld (*Zwolle*)

**Aquitaine (France):**

***Scientific committee:*** R. Salamon (chair), J. Beylot, M. Dupon, M. Le Bras, J.L. Pellegrin, J.M. Ragnaud;

***central coordination:* *F. Dabis****, G. Chêne, H. Jacqmin-Gadda, R. Thiébaut, S. Lawson-Ayayi, V. Lavignolle, E. Balestre, M.J. Blaizeau, M. Decoin, A.M. Formaggio, S. Delveaux, S. Labarerre, B. Uwamaliya, E. Vimard, L. Merchadou, G. Palmer, D. Touchard, D. Dutoit, F. Pereira, B. Boulant; ***participating physicians (city):*** J. Beylot, P. Morlat, N. Bernard, M. Bonarek, F. Bonnet, B. Coadou, P. Gelie, D. Jaubert, C. Nouts, D. Lacoste, M. Dupon, H. Dutronc, G. Cipriano, S. Lafarie, I. Chossat, J.Y. Lacut, B. Leng, J.L. Pellegrin, P. Mercié, J.F. Viallard, I. Faure, P. Rispal, C. Cipriano, S. Tchamgoué, M. Le Bras, F. Djossou, D. Malvy, J.P. Pivetaud, J.M. Ragnaud, D. Chambon, C. De La Taille, T. Galperine, S. Lafarie, D. Neau, A. Ochoa, C. Beylot, M.S. Doutre, J.H. Bezian, J.F. Moreau, J.L. Taupin, C. Conri, J. Constans, P. Couzigou, L. Castera, H. Fleury, M.E. Lafon, B. Masquelier, I. Pellegrin, P. Trimoulet, F. Moreau, C. Mestre, C. Series, A. Taytard (*Bordeaux*).

**AHOD (Australian HIV Observational Database, Australia):**

***Central coordination: M. Law*,*** K. Glenday and K. Petoumenos *(Sydney, New South Wales);*

*participating physicians(city, state):* J. Anderson, P.Cortissos, A. Mijch, K. Watson, N. Roth, J.Nicolson *(Melbourne, Victoria);* M.Bloch, S. Agrawal, T.Franic, D. Baker, R.Vale, A. Carr, D. Cooper, M.Lacey, K.Hesse *(Sydney, New South Wales);* J. Chuah, D.Lester, W. Fankhauser *(Gold Coast, Queensland),* S. Mallal, C.Forsdyke, S.Bulgannawar *(Perth, Western Australia).*

**BASS (Spain):**

***Central coordination:*** ***G. Calvo****,F. Torres, S. Mateu (*Barcelona*);

***participating physicians (city):*** P. Domingo, M.A. Sambeat, J. Gatell, E. Del Cacho, J. Cadafalch, M. Fuster (*Barcelona*); C. Codina, G. Sirera, A. Vaqué (*Badalona*).

**The Brussels St Pierre Cohort (Belgium):** N. Clumeck**, *S. De Wit****,M. Gerard, K. Kabeya, D. Konopnicki, A. Libois, M.C. Payen, B. Poll, Y. Van Laethem.

**CPCRA (USA):**

***Central coordination:*** J. Neaton, G. Bartsch, **W.M. El-Sadr*****, E. Krum, G. Thompson, D. Wentworth;

**participating physicians(city, state):** R. Luskin-Hawk (*Chicago, Illinois*); E. Telzak (*Bronx, New York*); W.M. El-Sadr (*Harlem, New York*); D.I. Abrams (*San Francisco, California*); D. Cohn (*Denver, Colorado*); N. Markowitz (*Detroit, Michigan*); R. Arduino (*Houston, Texas*); D. Mushatt (*New Orleans, Louisiana*); G. Friedland (*New Haven, Connecticut*); G. Perez (*Newark, New Jersey*); E. Tedaldi (*Philadelphia, Pennsylvania*); E. Fisher (*Richmond, Virginia*); F. Gordin (*Washington, DC*); L.R. Crane (*Detroit, Michigan*); J. Sampson (*Portland, Oregon*); J. Baxter (*Camden, New Jersey*).

**EuroSIDA (multinational):**

***Central coordination:*** ***O. Kirk****, C.H. Olsen, A. Mocroft, ***A.N. Phillips****, ***J.D. Lundgren*#****;*

***participating countries and physicians(city):*** **Argentina –** M. Losso (*Buenos Aires*);

**Austria** – N. Vetter (*Vienna*); **Belarus** – I. Karpov, A. Vassilenko (*Minsk*); VM Mitsura (*Gomel*); **Belgium** – N. Clumeck, S. De Wit, B. Poll (*Brussels*); R. Colebunders (*Antwerp*); **Bulgaria** – K. Kostov (*Sofia*); **Crotia - J. Begovac;** Czech **Republic** – L. Machala, H. Rozsypal (*Prague*); D. Sedlacek (Plzen); **Denmark** – J. Nielsen, J. Lundgren, T. Benfield, O. Kirk (Hvidovre); J. Gerstoft, T. Katzenstein, AB. E. Hansen, P Skinhøj (*Copenhagen*); C. Pedersen (*Odense*); L.Oestergaard (Aarhus)*;* **Estonia** –K. Zilmer *(Tallinn)*, Jelena Smidt (*Kohtla-Järve*); Finland – M. Ristola (*Helsinki*)**France** – C. Katlama, J-P Viard, P-M Girard (*Paris*); P. Vanhems ,JM. Livrozet (*Lyon*); C. Pradier (*Nice*); F. Dabis (Bordeaux); **Germany** – J. van Lunzen, H-J Stellbrink, O.Degen (*Hamburg*); S. Staszewski, J. Bogner (*Münich*); G. Fätkenheuer (*Cologne*); J. Rockstroh (*Bonn*); RE. Schmidt (*Hannover*); **Greece** – J. Kosmidis, P. Gargalianos, G. Xylomenos, H. Sambatakou, J. Perdios, G. Panos, A. Filandras (*Athens*); **Hungary** – D. Banhegyi (*Budapest*); **Ireland** – F. Mulcahy (*Dublin*); **Israel** – I. Yust, M. Burke, D. Turner (*Tel Aviv*); S. Pollack, J. Hassoun (*Haifa*); Z. ; S. Maayan (*Jerusalem*); **Italy** – A. Chiesi (*Rome*); C. Arici (*Bergamo*); R. Pristerá (*Bolzano*); F. Mazzotta, A. Gabbuti (*Firence*); R. Esposito, , I. Mazeu, C. Mussini (*Modena*); A. Chirianni, E. Montesarchio (*Naples*); V. Vullo, M. Lichtner, G. Antonucci, F. Iacomi, P. Narciso, C. Vlassi, M. Zaccarelli (*Rome*); A. Lazzarin, R. Finazzi, M. Galli, A. Ridolfo, A. D'Arminio Monforte (*Milan*); **Latvia** – B. Rozentale, P. Aldins (*Riga*). **Lithuania** – S. Chaplinskas (*Vilnius*); **Luxembourg** – R. Hemmer, T. Staub (*Luxembourg*); **Netherlands** – P. Reiss (*Amsterdam*); **Norway** – J. Bruun, A. Maeland, V. Ormaasen (*Oslo*); **Poland** – B. Knysz, J. Gasiorowski (*Wroclaw*); A. Horban (*Warsaw*); D. Prokopowicz, A. Wiercinska-Drapalo (*Bialystok*); A. Boron-Kaczmarska, M. Pynka (*Szczecin*); M. Beniowski, E. Mularska (*Chorzow*); H. Trocha (*Gdansk*); **Portugal** – F. Antunes, E. Valadas, K. Mansinho, F. Maltez (*Lisbon*); **Romania** –D. Duiculescu, V. Babes, (*Bucarest*); **Russia** – E. Vinogradova, A. Rakhmanova (*St. Petersburg*), S. Buzunova ( *Novgorod*); **Serbia & Montenegro** – D. Jevtovic (Belgrade); **Slovakia** – M. Mokráš, D. Staneková (*Bratislava*); **Spain** – J. González-Lahoz, L. Martin-Carbonero, P. Labarga, V. Soriano (*Madrid*); B. Clotet, A. Jou, J. Conejero, L. Ruiz, C. Tural (*Badalona*); J.M. Gatell, J.M. Miró, P. Domingo, M. Gutierrez, G. Mateo, MA. Sambeat(*Barcelona*); **Sweden** –A. Karlsson(*Stockholm*); PO Persson (*Hundinge*), L. Flamholc (*Malmö*); **Switzerland** – B. Ledergerber, R.Weber (*Zürich*); P. Francioli, M. Cavassini (*Lausanne*); B. Hirschel, E. Boffi (*Geneve*); H. Furrer (*Bern*); M. Battegay, L. Elzi (*Basel*); **Ukraine** – E. Kravchenko, N. Chentsova (*Kyiv*); **United Kingdom** – M. Fisher (*Brighton*); R. Brettle (*Edinburgh*); S. Barton, A.M. Johnson, D. Mercey, A. Phillips, M. Murphy, M.A. Johnson, J. Weber, G. Scullard (*London*).

**HivBivus (Sweden):**

***Central coordination:* *L. Morfeldt**,** G. Thulin, A. Sundström;

***participating physicians(city):*** B. Åkerlund (*Huddinge*); K. Koppel, A. Karlsson (*Stockholm*); L. Flamholc*,* C. Håkangård (*Malmö*).

## ICONA (Italy):

## *Central coordination:* *A. d’Arminio Monforte**, P. Pezzotti;

## *participing physicians:* M. Moroni, A. d'Arminio Monforte, A. Cargnel, S. Merli, G Rizzardini, C. Pastecchia, A. Lazzarin, A Castagna, L. Caggese, C. Moioli (*Milano*); M.S. Mura, M. Mannazzu (*Sassari*); F. Suter, C. Arici (*Bergamo*); P.E. Manconi, P. Piano (*Cagliari*); F. Mazzotta, S. Lo Caputo (*Firenze*); A. Poggio, G. Bottari (*Verbania*); G. Pagano, A. Alessandrini (*Genova*); A. Scasso, A. Vincenti (*Lucca*); V. Abbadessa, S. Mancuso (*Palermo*); F. Alberici, A. Ruggieri (*Piacenza*); M. Arlotti, P. Ortolani (*Rimini*); F. De Lalla, G. Tositti (*Vicenza*); G Cassola, R. Piscopo (*Genova*); E. Raise, F Ebo (*Venezia*); F. Soscia, L. Tacconi (*Latina*); U. Tirelli, G Di Gennaro (*Aviano*); D. Santoro, L. Pusterla (*Como*); G.Carosi, C Torti (*Brescia*); G. Cadeo, D. Bertelli (*Brescia*); G. Carnevale, D Galloni (*Cremona*); G. Filice, R. Bruno (*Pavia*); G Di Perri, I Arnaudo, P. Caramello, GC Orofino, M.L. Soranzo, M. Bonasso (*Torino*); T Quirino, S Melzi (*Busto Arsizio*); F. Chiodo, V. Colangeli (*Bologna*); G. Magnani, M. Ursitti (*Regio Emilia*); F. Menichetti, C. Martinelli (*Pisa*); R. Esposito, C. Mussini (*Modena*); F. Ghinelli, L. Sighinolfi (*Ferrara*); O. Coronado (*Bologna*); G. Ballardini, E Rizzo (*Ravenna*); M. Montroni, MC Braschi (*Ancona*); E. Petrelli, A. Cioppi (*Pesaro*); R Cauda, A. De Luca, N. Petrosillo, P. Noto, P. Narciso, G Bontempo, A. Antinori, R Acinapura, G Antonucci, P. De Longis, V. Vullo, M. Lichtner (*Roma*); G. Pastore, N Ladisa (*Bari*); A. Chirianni, R Viglietti, M. Piazza, S. Nappa, N. Abrescia, M. De Marco (*Napoli*); A. Colomba, T. Prestileo (*Palermo*); C. De Stefano, A. La Gala (*Potenza*); L Cosco, A. Scerbo (*Catanzaro*); P. Grima, P. Tundo (*Lecce*); J Vecchiet, M. D'Alessandro (*Chieti*); B. Grisorio, S. Ferrara (*Foggia*).

## The Nice Cohort (France):

## *Central coordination: C. Pradier**, E. Fontas, C. Caissotti;

## *participating physicians:* P. Dellamonica, L. Bentz, E. Bernard, , F. De Salvador-Guillouet, J. Durant, V. Mondain-Miton, I. Perbost, B. Prouvost-Keller, P. Pugliese, V. Rahelinirina, P.M. Roger, F. Vandenbos.

## SHCS (Swiss HIV Cohort Study, Switzerland): M. Battegay, E. Bernasconi, J. Böni, H. Bucher, Ph. Bürgisser, S. Cattacin, M. Cavassini, R.Dubs, M. Egger, L.Elzi, P. Erb, M. Fischer, M. Flepp, A. Fontana, P. Francioli (President of the SHCS), H.J. Furrer, M. Gorgievski, H. Günthard, B. Hirschel, L. Kaiser, C. Kind, Th. Klimkait, U. Lauper, B. Ledergerber, M. Opravil, F. Paccaud, G. Pantaleo, L. Perrin, J.-C. Piffaretti, M. Rickenbach, C. Rudin P. Schmid, J. Schüpbach, R. Speck, A. Telenti, A. Trkola, P. Vernazza, *R. Weber**, S. Yerly.

#### Financial acknowledgements:

Supported by the Oversight Committee for The Evaluation of Metabolic Complications of HAART, a collaborative committee with representation from academic institutions, the European Agency for the valuation of Medicinal Products, the Food and Drug Administration, the patient community, and all pharmaceutical companies with licensed anti-HIV drugs in the U.S. market: Abbott, Boehringer Ingelheim, Bristol-Myers Squibb, Gilead Sciences, GlaxoSmithKline, Merck, Pfizer, and Hoffman-LaRoche.

Supported by a grant (CURE/97-46486) from the Health Insurance Fund Council, Amstelveen, the Netherlands, to the AIDS Therapy Evaluation Project Netherlands (ATHENA); by a grant from the Agence Nationale de Recherches sur le SIDA (Action Coordonnée no.7, Cohortes), to the Aquitaine Cohort; by the Commonwealth Department of Health and Ageing, and a grant from the Australian National Council on AIDS, Hepatitis C and Related Diseases' Clinical Trials and Research Committee, to the Australian HIV Observational Database (AHOD); by grants from the Fondo de Investigación Sanitaria (FIS 99/0887) and Fundación para la Investigación y la Prevención del SIDA en Espanã (FIPSE 3171/00), to the Barcelona Antiretroviral Surveillance Study (BASS); by the National Institute of Allergy and Infectious Diseases, National Institutes of Health (grants 5U01AI042170-10 and 5U01AI046362-03), to the Terry Beirn Community Programs for Clinical Research on AIDS (CPCRA); by grants from the BIOMED 1 (CT94-1637) and BIOMED 2 (CT97-2713) programs and the fifth framework program (QLK2-2000-00773)of the European Commission and grants from Bristol-Myers Squibb, GlaxoSmithKline, Boehringer Ingelheim, and Roche, to the EuroSIDA study; by an unrestricted educational grant from Glaxo Wellcome, Italy, to the Italian Cohort Naive to Antiretrovirals (ICONA); and by a grant from the Swiss National Science Foundation, to the Swiss HIV Cohort Study (SHCS).
